# Supplementary material for: Law Enforcement Officer Knowledge of, Attitudes Toward, and Willingness to Use Extreme Risk Protection Orders
Source: PubMed Central journal article supplement (PMC10587793; doi:10.1001/jamanetworkopen.2023.38455), 2023-10-19
Supplement: jamanetwopen-e2338455-s001.pdf [file jamanetwopen-e2338455-s001.pdf]

## Supplementary Online Content

Pear VA, De Biasi A, Charbonneau A. Law enforcement officer knowledge of, attitudes toward, and willingness to use extreme risk protection orders. *JAMA Netw Open*. 2023;6(10):e2338455. doi:10.1001/jamanetworkopen.2023.38455

**eTable 1.** Scenario Details

**eTable 2.** Demographic Characteristics by Completion of Survey

**eTable 3.** Opinions on ERPO Petitioners

**eTable 4.** ERPO Opinions Overall and by Political Ideology

**eTable 5.** Agreement with Petitioning for an ERPOs in Hypothetical Scenarios

**eTable 6.** Reasons For and Against Petitioning for an ERPO by Scenario

**eTable 7.** Suggested Further Actions

**eTable 8.** Indications of Misconceptions About ERPOs Laws in Qualitative Explanations of Why/Why Not an ERPO Should Be Used in Specific Case Scenarios

**eMethods.** Survey Instrument

This supplementary material has been provided by the authors to give readers additional information about their work.

eTable 1. Scenario Details

| Scenario No. and Abbreviated Description | Randomized Feature      | Scenario Text                                                                                                                                                                                                                                                                                                  |
|------------------------------------------|-------------------------|----------------------------------------------------------------------------------------------------------------------------------------------------------------------------------------------------------------------------------------------------------------------------------------------------------------|
| 1A. IPV against wife                     | Gender                  | A couple is going through a divorce and the <b>husband</b> threatens to kill his <b>wife</b> during an argument. The wife reports the threat to the police and says that her husband owns several firearms. The police have been called to the house for domestic violence in the past year.                   |
| 1B. IPV against husband                  |                         | A couple is going through a divorce and the <b>wife</b> threatens to kill her <b>husband</b> during an argument. The husband reports the threat to the police and says that his wife owns several firearms. The police have been called to the house for domestic violence in the past year.                   |
| 2A. IPV against husband, gay             | Target of threat        | A gay couple is going through a divorce and one of the men threatens to <b>kill the other</b> during an argument. The threatened man reports the threat to the police and says that his husband owns several firearms. The police have been called to the house for <b>domestic violence</b> in the past year. |
| 2B. Suicide, Divorce, gay                |                         | A gay couple is going through a divorce and one of the men threatens to <b>kill himself</b> during an argument. The other man reports the threat to the police and says that his husband owns several firearms. The police have been called to the house for <b>suicidal threats</b> in the past year.         |
| 3A. Suicide, depression                  | Risk factor for suicide | At his father’s funeral, a person with a history of <b>depression</b> tells his sister that he’d be better off dead. He just inherited his father’s firearms. His sister reports the situation to the police.                                                                                                  |
| 3B. Suicide, addiction                   |                         | At his father’s funeral, a person with a history of <b>addiction</b> tells his sister that he’d be better off dead. He just inherited his father’s firearms. His sister reports the situation to the police.                                                                                                   |
| 4A. School shooting, assault rifle       | Firearm type            | Shortly after sharing a post on Facebook praising school shooters, an 18-year old high school student posts a video of himself shooting an <b>assault rifle (e.g., an AR or AK type rifle)</b> at a shooting range. The student has been suspended from school several times.                                  |
| 4B. School shooting, pistol              |                         | Shortly after sharing a post on Facebook praising school shooters, an 18-year old high school student posts a video of himself shooting a <b>pistol</b> at a shooting range. The student has been suspended from school several times.                                                                         |
| 5A. Homicide, Black                      | Race                    | During an altercation at a party, a 23-year-old <b>Black</b> man threatens to shoot another young man in retaliation for a previous conflict. An anonymous partygoer reported the threat and believes the man owns firearms.                                                                                   |
| 5B. Homicide, white                      |                         | During an altercation at a party, a 23-year-old <b>white</b> man threatens to shoot another young man in retaliation for a previous conflict. An anonymous partygoer reported the threat and believes the man owns firearms.                                                                                   |

eTable 2. Demographic Characteristics by Completion of Survey

|                           | Ended Survey<br>Early<br>N (%), (n=235) | Completed Survey<br>(Analytic Dataset)<br>N (%), (n=283) | P-value <sup>a</sup> |
|---------------------------|-----------------------------------------|----------------------------------------------------------|----------------------|
| <b>Age (med, IQR)</b>     | 42 (35, 47)                             | 40 (34, 46)                                              | 0.2                  |
| Unknown                   | 52                                      |                                                          |                      |
| <b>Highest Education</b>  |                                         |                                                          | <0.01                |
| < Bachelor's degree       | 104 (57.1)                              | 107 (37.8)                                               |                      |
| Bachelor's degree         | 59 (32.4)                               | 104 (36.7)                                               |                      |
| > Bachelor's degree       | 19 (10.4)                               | 72 (25.4)                                                |                      |
| Unknown                   | 53                                      |                                                          |                      |
| <b>Gender</b>             |                                         |                                                          | 0.09                 |
| Male                      | 146 (81.6)                              | 241 (85.2)                                               |                      |
| Female                    | 28 (15.6)                               | 40 (14.1)                                                |                      |
| Transgender Man           | 0 (0.0)                                 | 1 (0.4)                                                  |                      |
| Decline                   | 5 (2.8)                                 | 1 (0.4)                                                  |                      |
| Unknown                   | 56                                      |                                                          |                      |
| <b>Race/Ethnicity</b>     |                                         |                                                          | 0.03                 |
| Asian/Pacific Islander    | 6 (3.3)                                 | 5 (1.8)                                                  |                      |
| Black                     | 4 (2.2)                                 | 16 (5.7)                                                 |                      |
| Hispanic                  | 31 (16.9)                               | 45 (15.9)                                                |                      |
| White                     | 121 (66.1)                              | 202 (71.4)                                               |                      |
| Multiple                  | 7 (3.8)                                 | 3 (1.1)                                                  |                      |
| Other                     | 2 (1.1)                                 | 5 (1.8)                                                  |                      |
| Decline                   | 12 (6.6)                                | 7 (2.5)                                                  |                      |
| Unknown                   | 52                                      |                                                          |                      |
| <b>State of Residence</b> |                                         |                                                          | 0.21                 |
| California                | 121 (51.5)                              | 152 (53.7)                                               |                      |
| Colorado                  | 0 (0)                                   | 4 (1.4)                                                  |                      |
| Connecticut               | 0 (0)                                   | 4 (1.4)                                                  |                      |
| Delaware                  | 1 (0.4)                                 | 1 (0.4)                                                  |                      |
| District of Columbia      | 1 (0.4)                                 | 2 (0.7)                                                  |                      |
| Florida                   | 31 (13.2)                               | 30 (10.6)                                                |                      |
| Illinois                  | 4 (1.7)                                 | 4 (1.4)                                                  |                      |
| Indiana                   | 2 (0.9)                                 | 2 (0.7)                                                  |                      |
| Maryland                  | 3 (1.3)                                 | 0 (0)                                                    |                      |
| Massachusetts             | 5 (2.1)                                 | 4 (1.4)                                                  |                      |
| Nevada                    | 1 (0.4)                                 | 2 (0.7)                                                  |                      |
| New Jersey                | 10 (4.3)                                | 9 (3.2)                                                  |                      |
| New York                  | 44 (18.7)                               | 41 (14.5)                                                |                      |
| Oregon                    | 1 (0.4)                                 | 1 (0.4)                                                  |                      |
| Vermont                   | 1 (0.4)                                 | 0 (0)                                                    |                      |
| Virginia                  | 8 (3.4)                                 | 19 (6.7)                                                 |                      |
| Washington                | 2 (0.9)                                 | 8 (2.8)                                                  |                      |

| <b>Political Ideology</b> |           |            | <0.01 |
|---------------------------|-----------|------------|-------|
| Conservative              | 88 (56.8) | 119 (45.4) |       |
| Moderate                  | 42 (27.1) | 49 (18.7)  |       |
| Liberal                   | 9 (5.8)   | 83 (31.7)  |       |
| Decline                   | 16 (10.3) | 11 (4.2)   |       |
| Unknown                   | 80        | 21         |       |

- a. P-values for categorical variables are from chi-square tests or Fisher's exact tests (when the expected cell size is <5). P-values for continuous variables are from Wilcoxon rank sum tests.

eTable 3. Opinions on ERPO Petitioners

| <b>Who should be able to petition for an ERPO?</b> | <b>N (%) Participants<br/>(n=283)</b> |
|----------------------------------------------------|---------------------------------------|
| Law enforcement                                    | 224 (79.2)                            |
| Mental health professional                         | 134 (47.3)                            |
| Family members                                     | 123 (43.5)                            |
| Health care professional                           | 118 (41.7)                            |
| Parents or legal guardians                         | 82 (29.0)                             |
| People who are living together                     | 57 (20.1)                             |
| People who have a child in common                  | 55 (19.4)                             |
| Current or former dating partner                   | 54 (19.1)                             |
| School administrator or teacher                    | 46 (16.3)                             |
| Employer or co-worker                              | 41 (14.5)                             |
| None of these                                      | 17 (6.0)                              |
| Unsure                                             | 6 (2.1)                               |
| Other                                              | 3 (1.1)                               |

eTable 4. ERPO Opinions Overall and by Political Ideology

|                                                                                                   | Total<br>N (%)<br>(n=283) | Self-Identified Political Ideology <sup>a</sup> |                             |                            |
|---------------------------------------------------------------------------------------------------|---------------------------|-------------------------------------------------|-----------------------------|----------------------------|
|                                                                                                   |                           | Conservative<br>N (%)<br>(n=119)                | Moderate<br>N (%)<br>(n=49) | Liberal<br>N (%)<br>(n=83) |
| <b>“I would petition for a ERPO under the right circumstances and with appropriate training.”</b> |                           |                                                 |                             |                            |
| Strongly disagree                                                                                 | 32 (11.3)                 | 18 (15.1)                                       | 3 (6.1)                     | 4 (4.8)                    |
| Somewhat disagree                                                                                 | 30 (10.6)                 | 14 (11.8)                                       | 9 (18.4)                    | 3 (3.6)                    |
| Somewhat agree                                                                                    | 109 (38.5)                | 39 (32.8)                                       | 17 (34.7)                   | 45 (54.2)                  |
| Strongly agree                                                                                    | 112 (39.6)                | 48 (40.3)                                       | 20 (40.8)                   | 31 (37.3)                  |
| <b>“ERPOs are likely to reduce firearm violence.”</b>                                             |                           |                                                 |                             |                            |
| Strongly disagree                                                                                 | 44 (15.5)                 | 24 (20.2)                                       | 6 (12.2)                    | 3 (3.6)                    |
| Somewhat disagree                                                                                 | 54 (19.1)                 | 33 (27.7)                                       | 11 (22.4)                   | 4 (4.8)                    |
| Somewhat agree                                                                                    | 120 (42.4)                | 45 (37.8)                                       | 18 (36.7)                   | 46 (55.4)                  |
| Strongly agree                                                                                    | 65 (23.0)                 | 17 (14.3)                                       | 14 (28.6)                   | 30 (36.1)                  |
| <b>“Other states should adopt these policies.”</b>                                                |                           |                                                 |                             |                            |
| Strongly disagree                                                                                 | 43 (15.2)                 | 23 (19.3)                                       | 7 (14.3)                    | 3 (3.6)                    |
| Somewhat disagree                                                                                 | 43 (15.2)                 | 25 (21.0)                                       | 11 (22.4)                   | 3 (3.6)                    |
| Somewhat agree                                                                                    | 114 (40.3)                | 49 (41.2)                                       | 17 (34.7)                   | 38 (45.8)                  |
| Strongly agree                                                                                    | 83 (29.3)                 | 22 (18.5)                                       | 14 (28.6)                   | 39 (47.0)                  |

a. 32 participants (11.3%) did not report their political preference. Chi-square tests show significant differences across political ideology for all three opinions (p-value for each is <0.01).

eTable 5. Agreement with Petitioning for an ERPOs in Hypothetical Scenarios

**A. Agreement by Scenario, Both Versions<sup>a</sup>**

| Scenario                          | The officer should petition the court for a GVRO (N %) |                   |                |                |
|-----------------------------------|--------------------------------------------------------|-------------------|----------------|----------------|
|                                   | Strongly Disagree                                      | Somewhat Disagree | Somewhat Agree | Strongly Agree |
| 1A. IPV against wife (n=147)      | 12 (8.2)                                               | 30 (20.4)         | 56 (38.1)      | 49 (33.3)      |
| 1B. IPV against husband (n=126)   | 12 (9.5)                                               | 15 (11.9)         | 60 (47.6)      | 39 (31.0)      |
| 2A. IPV, gay (n=152)              | 16 (10.5)                                              | 19 (12.5)         | 62 (40.8)      | 55 (36.2)      |
| 2B. Suicide, gay, divorce (n=131) | 16 (12.2)                                              | 19 (14.5)         | 52 (39.7)      | 44 (33.6)      |
| 3A. Suicide, depression (n=142)   | 24 (16.9)                                              | 41 (28.9)         | 44 (31.0)      | 33 (23.2)      |
| 3B. Suicide, addiction (n=141)    | 21 (14.9)                                              | 41 (29.1)         | 50 (35.5)      | 29 (20.6)      |
| 4A. School, assault rifle (n=134) | 20 (14.9)                                              | 27 (20.1)         | 43 (32.1)      | 44 (32.8)      |
| 4B. School, pistol (n=149)        | 20 (13.4)                                              | 31 (20.8)         | 53 (35.6)      | 45 (30.2)      |
| 5A. Homicide, Black (n=142)       | 21 (14.8)                                              | 40 (28.2)         | 57 (40.1)      | 24 (16.9)      |
| 5B. Homicide, white (n=141)       | 32 (22.7)                                              | 30 (21.3)         | 52 (36.9)      | 27 (19.1)      |

**B. Agreement by Scenario and Officer ERPO Training and Experience<sup>b</sup>**

| Scenario        | The officer should petition the court for a GVRO (N %) |                   |                |                |
|-----------------|--------------------------------------------------------|-------------------|----------------|----------------|
|                 | Strongly Disagree                                      | Somewhat Disagree | Somewhat Agree | Strongly Agree |
| IPV, Straight   |                                                        |                   |                |                |
| Training/Exp    | 9 (5.8)                                                | 17 (11.0)         | 76 (49.4)      | 52 (33.8)      |
| None            | 15 (12.6)                                              | 28 (23.5)         | 40 (33.6)      | 36 (30.3)      |
| Domestic, Gay   |                                                        |                   |                |                |
| Training/Exp    | 10 (6.1)                                               | 16 (9.8)          | 78 (47.6)      | 60 (36.6)      |
| None            | 22 (18.5)                                              | 22 (18.5)         | 36 (30.3)      | 39 (32.8)      |
| Suicide         |                                                        |                   |                |                |
| Training/Exp    | 18 (11.0)                                              | 43 (26.2)         | 64 (39.0)      | 39 (23.8)      |
| None            | 27 (22.7)                                              | 39 (32.8)         | 30 (25.2)      | 23 (19.3)      |
| School shooting |                                                        |                   |                |                |
| Training/Exp    | 17 (10.4)                                              | 30 (18.3)         | 66 (40.2)      | 51 (31.1)      |
| None            | 23 (19.3)                                              | 28 (23.5)         | 30 (25.2)      | 38 (31.9)      |
| Homicide        |                                                        |                   |                |                |
| Training/Exp    | 20 (12.2)                                              | 34 (20.7)         | 76 (46.3)      | 34 (20.7)      |
| None            | 33 (27.7)                                              | 36 (30.3)         | 33 (27.7)      | 17 (14.3)      |

- None of the randomized differences within scenarios were associated with statistically significant differences in agreement to petition for an ERPO.
- For each scenario, the chi-square tests by training/experience had a p-value < 0.05. 164 participants had ERPO training or direct personal experience with an ERPO; 119 did not.

eTable 6. Reasons For and Against Petitioning for an ERPO, by Scenario

A. Proportion of Participants Providing Free-Text Explanation

| Scenario                      | Total Proportion providing explanation, N (%) | Agree with ERPO Proportion providing explanation, N (%) | Disagree with ERPO Proportion providing explanation, N (%) |
|-------------------------------|-----------------------------------------------|---------------------------------------------------------|------------------------------------------------------------|
| IPV against wife <sup>a</sup> | 113/147 (76.9)                                | 75/105 (71.4)                                           | 38/42 (90.5)                                               |
| Domestic, gay                 | 215/283 (76.0)                                | 151/213 (70.9)                                          | 64/70 (91.4)                                               |
| Suicide                       | 191/283 (67.5)                                | 85/156 (54.5)                                           | 106/127 (83.5)                                             |
| School Shooting               | 177/283 (62.5)                                | 104/185 (56.2)                                          | 73/98 (74.5)                                               |
| Homicide                      | 203/283 (71.7)                                | 95/160 (59.4)                                           | 108/123 (87.8)                                             |

B. Most Popular Reasons For and Against Petitioning for an ERPO, by Scenario

| Scenario                            | The officer should petition the court for an ERPO (N %)                         |                                            |                                                                        |                                                                                                                                   |
|-------------------------------------|---------------------------------------------------------------------------------|--------------------------------------------|------------------------------------------------------------------------|-----------------------------------------------------------------------------------------------------------------------------------|
|                                     | Strongly Agree                                                                  | Somewhat Agree                             | Somewhat Disagree                                                      | Strongly disagree                                                                                                                 |
| IPV against wife <sup>a</sup>       | Access to firearms<br>12/49 (24.5)<br>&<br>Safety/DV<br>History<br>12/49 (24.5) | Additional info<br>needed<br>10/56 (17.9)  | Firearms would<br>be removed for a<br>different reason<br>11/30 (36.7) | Validity of<br>allegations/threat<br>3/12 (25.0)                                                                                  |
| Same-sex<br>domestic<br>disturbance | Threat to<br>self/others<br>23/99 (23.2)                                        | Additional info<br>needed<br>13/114 (11.4) | Other protective<br>order preferred<br>6/38 (15.8)                     | Seek psych eval/<br>protective order<br>6/32 (18.8)<br>&<br>Firearms would be<br>removed for a<br>different reason<br>6/32 (18.8) |
| Suicide                             | Threat to self<br>20/62 (32.3)                                                  | Additional info<br>needed<br>16/94 (17.0)  | Not a credible<br>threat<br>38/82 (46.3)                               | Not a credible threat<br>19/45 (42.2)                                                                                             |
| School shooting                     | Potential for<br>danger<br>36/89 (40.4)                                         | Further<br>investigation<br>18/96 (18.8)   | Further<br>investigation<br>20/58 (34.5)                               | No illegal behavior<br>13/40 (32.5)                                                                                               |
| Homicide                            | Made (illegal)<br>threat<br>12/51 (23.5)                                        | Additional info<br>needed<br>28/109 (25.7) | Additional info<br>needed<br>35/70 (50.0)                              | Additional info<br>needed<br>19/53 (35.8)                                                                                         |

a. Results for IPV against husband (n=126) not included due to an error in the survey flow.



eTable 7. Suggested Further Actions

A. By Scenario

| Scenario                                 | Further Action (N %) |                   |            |           |              |
|------------------------------------------|----------------------|-------------------|------------|-----------|--------------|
|                                          | Arrest               | DVRO <sup>b</sup> | Psych Eval | Other     | Nothing Else |
| IPV against wife <sup>a</sup><br>(n=147) | 81 (55.1)            | 76 (51.7)         | 0 (0.0)    | 25 (17.0) | 1 (0.7)      |
| IPV, gay<br>(n=152)                      | 71 (46.7)            | 107 (70.4)        | 35 (23.0)  | 20 (13.2) | 5 (3.3)      |
| Suicide, divorce, gay<br>(n=131)         | 32 (24.4)            | 36 (27.5)         | 92 (70.2)  | 13 (9.9)  | 1 (0.8)      |
| Suicide, depression<br>(n=142)           | 22 (15.5)            | 21 (14.8)         | 86 (60.6)  | 31 (21.8) | 5 (3.5)      |
| Suicide, addiction<br>(n=141)            | 19 (13.5)            | 23 (16.3)         | 83 (58.9)  | 23 (16.3) | 15 (10.6)    |
| School, assault rifle<br>(n=134)         | 26 (19.4)            | 18 (13.4)         | 64 (47.8)  | 40 (29.9) | 16 (11.9)    |
| School, pistol<br>(n=149)                | 33 (22.1)            | 32 (21.5)         | 60 (40.3)  | 47 (31.5) | 22 (14.8)    |
| Homicide, Black<br>(n=142)               | 64 (45.1)            | 23 (16.2)         | 19 (13.4)  | 45 (31.7) | 21 (14.8)    |
| Homicide, white<br>(n=141)               | 65 (46.1)            | 34 (24.1)         | 22 (15.6)  | 40 (28.4) | 15 (10.6)    |

B. Most Popular Further Action by Scenario and ERPO Endorsement

| Scenario                      | Most Popular Further Action (N %) |               |                           |              |
|-------------------------------|-----------------------------------|---------------|---------------------------|--------------|
|                               | In addition to ERPO               |               | Instead of ERPO           |              |
| IPV against wife <sup>a</sup> | DVRO                              | 76/105 (72.4) | Arrest                    | 21/42 (50.0) |
| IPV, gay                      | DVRO                              | 84/117 (71.8) | DVRO                      | 23/35 (65.7) |
| Suicide, divorce, gay         | Psych Eval                        | 65/96 (67.7)  | Psych Eval                | 27/35 (77.1) |
| Suicide, depression           | Psych Eval                        | 49/77 (63.6)  | Psych Eval                | 37/65 (56.9) |
| Suicide, addiction            | Psych Eval                        | 47/79 (59.5)  | Psych Eval                | 36/62 (58.1) |
| School, assault rifle         | Psych Eval                        | 46/87 (52.9)  | Other Action <sup>c</sup> | 20/47 (42.6) |
| School, pistol                | Psych Eval                        | 45/98 (45.9)  | Other Action <sup>c</sup> | 23/51 (45.1) |
| Homicide, Black               | Arrest                            | 52/81 (64.2)  | Other Action <sup>c</sup> | 26/61 (42.6) |
| Homicide, white               | Arrest                            | 43/79 (54.4)  | Other Action <sup>c</sup> | 24/62 (38.7) |

- a. Results for IPV against husband (n=126) not shown due to an error in the survey flow.
- b. DVRO = domestic violence restraining order
- c. The most popular other action was further investigation/interviewing involved parties.

eTable 8. Indications of Misconceptions About ERPOs Laws in Qualitative Explanations of Why/Why Not an ERPO Should Be Used in Specific Case Scenarios

| <b>Characteristic</b>                               | <b>Overall<br/>(n=283)<br/>N (%)</b> | <b>Strongly<br/>agree<br/>N (%)</b> | <b>Somewhat<br/>agree<br/>N (%)</b> | <b>Somewhat<br/>disagree<br/>N (%)</b> | <b>Strongly<br/>disagree<br/>N (%)</b> |
|-----------------------------------------------------|--------------------------------------|-------------------------------------|-------------------------------------|----------------------------------------|----------------------------------------|
| <b>Scenario 1: IPV<br/>against wife<sup>a</sup></b> |                                      | N=49                                | N=56                                | N=30                                   | N=12                                   |
| Weapon not<br>brandished                            | 7 (4.8)                              | 0 (0)                               | 1 (1.8)                             | 4 (13.3)                               | 2 (16.7)                               |
| No violence/crime                                   | 1 (0.7)                              | 0 (0)                               | 0 (0)                               | 0 (0)                                  | 1 (8.3)                                |
| 2 <sup>nd</sup> Amendment/<br>constitutional rights | 6 (4.1)                              | 0 (0)                               | 0 (0)                               | 5 (16.7)                               | 1 (8.3)                                |
| <b>Scenario 2: Domestic<br/>disturbance</b>         |                                      | N=99                                | N=114                               | N=38                                   | N=32                                   |
| Threat did not<br>involve a firearm                 | 6 (2.1)                              | 0 (0)                               | 0 (0)                               | 3 (7.9)                                | 3 (9.4)                                |
| 2 <sup>nd</sup> Amendment/<br>constitutional rights | 7 (2.5)                              | 1 (1.0)                             | 1 (0.9)                             | 3 (7.9)                                | 2 (6.2)                                |
| <b>Scenario 3: Suicide</b>                          |                                      | N=62                                | N=94                                | N=82                                   | N=45                                   |
| No crime                                            | 3 (1.1)                              | 0 (0)                               | 0 (0)                               | 1 (1.2)                                | 2 (4.4)                                |
| 2 <sup>nd</sup> Amendment/<br>constitutional rights | 9 (3.2)                              | 0 (0)                               | 0 (0)                               | 4 (4.9)                                | 5 (11.1)                               |
| <b>Scenario 4: School<br/>shooting</b>              |                                      | N=89                                | N=96                                | N=58                                   | N=40                                   |
| No crime                                            | 27 (9.5)                             | 0 (0)                               | 1 (1.0)                             | 13 (22.4)                              | 13 (32.5)                              |
| <b>Scenario 5: Homicide</b>                         |                                      | N=51                                | N=109                               | N=70                                   | N=53                                   |
| Weapon not<br>brandished                            | 4 (1.4)                              | 0 (0)                               | 0 (0)                               | 3 (4.3)                                | 1 (1.9)                                |
| No crime/unclear if<br>crime was committed          | 7 (2.5)                              | 0 (0)                               | 2 (1.8)                             | 3 (4.3)                                | 2 (3.8)                                |
| 2 <sup>nd</sup> Amendment/<br>constitutional rights | 10 (3.5)                             | 0 (0)                               | 0 (0)                               | 3 (4.3)                                | 7 (13.2)                               |

a. Results for IPV against husband (n=126) not included due to an error in the survey flow.

## eMethods: Survey Instrument

---

### Start of Block: Screening

Q1.1 In which state do you currently reside?

▼ Alabama (1) ... I do not reside in the United States (53)

Q1.2 Are you currently a sworn law enforcement officer working in  $\{Q1.1/ChoiceGroup/SelectedChoices\}$ ? (If you are retired or in the academy, please select "No")

- Yes (1)
- No (2)

### End of Block: Screening

---

### Start of Block: Demographics and professional experience

Q2.1 The first few questions are about you and your background.

Q2.2 I am \_\_\_ years old.

Q2.3 Please indicate the highest level of education that you have completed (select one):

- Less than high school diploma (1)
- High school diploma or GED (2)
- Some college (3)
- Associate's degree (4)
- Bachelor's degree (5)
- Master's degree (6)
- Professional degree (7)
- Doctorate (8)

Q2.4 I identify as (choose one):

- Male (1)
- Female (2)
- Transgender man (3)
- Transgender woman (4)
- Non-binary (5)
- An identity not listed above (6)
- Decline to state (7)

Q2.5 Do you identify as Hispanic and/or Latino?

- Yes (1)
- No (2)
- Decline to state (3)

Q2.6 I identify as (choose all that apply):

- White (1)

- Black or African American (2)
- Native American (3)
- East Asian (4)
- Southeast Asian (5)
- South Asian (6)
- Pacific Islander or Native Hawaiian (7)
- Middle Eastern or North African (8)
- A racial/ethnic group not listed above: (9)
- Decline to state (10)

Q2.7 In general, do you think of yourself as...

- Extremely liberal (1)
- Liberal (2)
- Slightly liberal (3)
- Moderate, middle of the road (4)
- Slightly conservative (5)
- Conservative (6)
- Extremely conservative (7)
- Decline to state (8)

Q2.8 Do you have a political party preference?

- The Democratic Party (1)
- The Republican Party (2)
- The Green Party (3)
- The Libertarian Party (4)
- Other (5) \_\_\_\_\_
- No political party preference (6)
- Decline to state (7)

Q2.9 I was sworn in as a police officer in \_\_\_\_\_ (year).

Q2.10 My current title is (select one):

- Police Officer (1)
- Detective (2)
- Sergeant (3)
- Lieutenant (4)
- Captain (5)
- Commander (6)

- Deputy Chief (7)
- Other: (8) \_\_\_\_\_

Q2.11 My current assignment is (check all that apply currently):

- Vehicle patrol (1)
- Foot patrol (2)
- Bike patrol (3)
- Mounted patrol (4)
- Motorcycle patrol (5)
- School patrol or Youth resources (6)
- SWAT (7)
- K9 (8)
- Narcotics (9)
- Special Investigations (10)
- Community policing (11)
- Training (12)
- Other (13) \_\_\_\_\_

Q2.12 I typically work in an area that is

- Urban (1)
- Suburban (2)
- Rural (3)

*Display This Question:*

*If 50 States, D.C. and Puerto Rico = California*

Q2.13 Which county in California do you work in?

County (1)

▼ Alameda County (1) ... Yuba County (58)

Q2.14 Approximately how many sworn officers serve in your agency?

\_\_\_\_\_

**End of Block: Demographics and professional experience**

**Start of Block: GVRO Familiarity**

Q3.1 The next few questions pertain to Extreme Risk Protection Orders (ERPOs), which are also known as Gun Violence Restraining Orders (GVROs), or “red flag” laws.

Q3.2 Have you heard of ERPOs, GVROs, or red flag laws prior to taking this survey?

- Yes (1)
- No (2)

*Display This Question:*

*If Have you heard of ERPOs, GVROs, or red flag laws prior to taking this survey? = Yes*

Q3.3 How familiar are you with ERPOs, GVROs, or red flag laws?

- Not at all familiar (1)
- Somewhat familiar (2)
- Very familiar (3)

**End of Block: GVRO Familiarity**

---

**Start of Block: GVRO opinions**

Q4.1 An ERPO, GVRO, or red flag law generally allows family members, household members, and the police to ask a judge to issue an order to temporarily remove guns and prevent the purchase of new guns by individuals who pose a significant danger of harming themselves or others and for whom alternative measures, such as arrest or psychiatric hospitalization, are inappropriate or have been ineffective. The order is temporary, usually lasting between three weeks to one year. From here on, we'll refer to all of these types of policies as "GVRO laws," which reflects the terminology used in California law.

Q4.2 For each statement, please indicate the extent to which you agree or disagree.

|                                                                     | Strongly disagree<br>(1) | Somewhat<br>disagree (2) | Somewhat agree<br>(3) | Strongly agree (4)    |
|---------------------------------------------------------------------|--------------------------|--------------------------|-----------------------|-----------------------|
| I would be willing to petition the court for a GVRO under the right |                          |                          |                       |                       |
| circumstances and with appropriate training on the process. (1)     | <input type="radio"/>    | <input type="radio"/>    | <input type="radio"/> | <input type="radio"/> |
| GVROs are likely to reduce firearm violence. (2)                    | <input type="radio"/>    | <input type="radio"/>    | <input type="radio"/> | <input type="radio"/> |
| Other states should adopt these policies. (3)                       | <input type="radio"/>    | <input type="radio"/>    | <input type="radio"/> | <input type="radio"/> |

Q4.3 Why do you think other states should or should not adopt GVRO laws?

---

Q4.

Who do you think should be allowed to request a GVRO from a judge? (Select all that apply)

- Family members (1)
- Current or former dating partner (2)
- People who have a child in common (3)
- People who are living together (4)
- Parents or legal guardians (5)
- Law enforcement (6)
- Health care professional (7)
- Mental health professional (8)
- School administrator or teacher (9)
- Employer or co-worker (10)
- None of these (11)
- Other (please specify): (12) \_\_\_\_\_
- Unsure (13)

End of Block: GVRO opinions

---

Start of Block: GVRO use and training

Q5.1 Has your department been directly involved in GVRO cases?

- Yes (1)
- No (2)
- I don't know (3)

Q5.2 Have you noticed a change in GVRO use since the coronavirus outbreak began?

- Yes, increased use (1)
- Yes, decreased use (2)
- No change (3)
- I don't know (4)

Q5.3 Have you received training on GVROs?

- Yes (1)
- No (2)
- I don't know (3)

Q5.4 How knowledgeable do you feel regarding the following topics:

|                                                       | Not at all knowledgeable (1) | Somewhat knowledgeable (2) | Very knowledgeable (3) |
|-------------------------------------------------------|------------------------------|----------------------------|------------------------|
| Deciding when a GVRO is appropriate (1)               | <input type="radio"/>        | <input type="radio"/>      | <input type="radio"/>  |
| The procedures involved in petitioning for a GVRO (2) | <input type="radio"/>        | <input type="radio"/>      | <input type="radio"/>  |

Q5.5 If your superior directed you to serve a GVRO how confident are you that you would be able to effectively do so?

- Not at all confident (1)
- Somewhat confident (2)
- Very confident (3)

Q5.6 Have you ever been directly involved in a GVRO case?

- Yes (1)
- No (2)
- I don't know (3)

*Display This Question:*

*If Have you ever been directly involved in a GVRO case? = Yes*

Q5.7 Approximately how many GVRO cases have you been involved in?

- 1-5 (1)
- 6-10 (2)
- 11-20 (3)
- 21-50 (4)
- Over 50 (5)

End of Block: GVRO use and training

---

Start of Block: Scenario

Q7.1 Now we'll present brief scenarios and ask for your opinion on whether the police should pursue an GVRO. We're interested in your initial reaction to the limited amount of information provided on each situation.

End of Block: Scenario

---

Start of Block: Scenario 1A



Q8.1 Scenario 1: A couple is going through a divorce and the husband threatens to kill his wife during an argument. The wife reports the threat to the police and says that her husband owns several firearms. The police have been called to the house for domestic violence in the past year.

Q8.2 Please indicate the extent to which you agree or disagree with the following:

|                                                                                                    | Strongly disagree<br>(1) | Somewhat<br>disagree (2) | Somewhat agree<br>(3) | Strongly agree (6)    |
|----------------------------------------------------------------------------------------------------|--------------------------|--------------------------|-----------------------|-----------------------|
| The police officers responding to this situation should petition the court to issue a GVRO.<br>(1) | <input type="radio"/>    | <input type="radio"/>    | <input type="radio"/> | <input type="radio"/> |

Display These Two Questions:

*If Please indicate the extent to which you agree or disagree with the following: = The police officers responding to this situation should petition the court to issue a GVRO. [ Strongly agree ]*

*Or Please indicate the extent to which you agree or disagree with the following: = The police officers responding to this situation should petition the court to issue a GVRO. [ Somewhat agree ]*

Q8.4 Why do you  $\{Q8.2/ChoiceGroup/SelectedAnswers\}$  that the police officer should petition for a GVRO?

---

Q8.6 In addition, the responding officers should... (check all that apply)

- Make an arrest (1)
- Seek a domestic violence restraining order (2)
- Seek psychiatric assessment/hospitalization (3)
- Take some other action (please specify): (4) \_\_\_\_\_
- None of these (5)

Display These Two Questions:

*If Please indicate the extent to which you agree or disagree with the following: = The police officers responding to this situation should petition the court to issue a GVRO. [ Somewhat disagree ]*

*Or Please indicate the extent to which you agree or disagree with the following: = The police officers responding to this situation should petition the court to issue a GVRO. [ Strongly disagree ]*

Q8.8 Why do you  $\{Q8.2/ChoiceGroup/SelectedAnswers\}$  that the police officer should petition for a GVRO?

---

Q8.10 Instead, the responding officers should... (check all that apply)

- Make an arrest (1)
- Seek a domestic violence restraining order (2)
- Seek psychiatric assessment/hospitalization (3)
- Take some other action (please specify): (4) \_\_\_\_\_
- None of these (5)

-----

Q8.12 Do you have any additional thoughts about this situation?

---

End of Block: Scenario 1A

---

Start of Block: Scenario 1B

Q9.1 Scenario 1: A couple is going through a divorce and the wife threatens to kill her husband during an argument. The husband reports the threat to the police and says that his wife owns several firearms. The police have been called to the house for domestic violence in the past year.

Q9.2 Please indicate the extent to which you agree or disagree with the following:

|                                                                                                    | Strongly disagree<br>(1) | Somewhat disagree (2) | Somewhat agree (3)    | Strongly agree (6)    |
|----------------------------------------------------------------------------------------------------|--------------------------|-----------------------|-----------------------|-----------------------|
| The police officers responding to this situation should petition the court to issue a GVRO.<br>(1) | <input type="radio"/>    | <input type="radio"/> | <input type="radio"/> | <input type="radio"/> |

*Display These Two Questions:*

*If Please indicate the extent to which you agree or disagree with the following: = The police officers responding to this situation should petition the court to issue a GVRO. [ Somewhat agree ]*

*Or Please indicate the extent to which you agree or disagree with the following: = The police officers responding to this situation should petition the court to issue a GVRO. [ Strongly agree ]*

Q9.4 Why do you  $\{Q9.2/ChoiceGroup/SelectedAnswers\}$  that the police officer should petition for a GVRO?

Q9.6 In addition, the responding officers should... (check all that apply)

- Make an arrest (1)
- Seek a domestic violence restraining order (2)
- Seek psychiatric assessment/hospitalization (3)
- Take some other action (please specify): (4) \_\_\_\_\_
- None of these (5)

Display These Two Questions:

If Please indicate the extent to which you agree or disagree with the following: = The police officers responding to this situation should petition the court to issue a GVRO. [ Strongly disagree ]

Or Please indicate the extent to which you agree or disagree with the following: = The police officers responding to this situation should petition the court to issue a GVRO. [ Somewhat disagree ]

Q9.8 Why do you  $\{Q9.2/ChoiceGroup/SelectedAnswers\}$  that the police officer should petition for a GVRO?

---

Q9.10 Instead, the responding officers should... (check all that apply)

- Make an arrest (1)
- Seek a domestic violence restraining order (2)
- Seek psychiatric assessment/hospitalization (3)
- Take some other action (please specify): (4) \_\_\_\_\_
- None of these (5)

Q9.12 Do you have any additional thoughts about this situation?

---

End of Block: Scenario 1B

Start of Block: Scenario 2A

Q10.1 Scenario 2: A gay couple is going through a divorce and one of the men threatens to kill the other during an argument. The threatened man reports the threat to the police and says that his husband owns several firearms. The police have been called to the house for domestic violence in the past year.

Q10.2 Please indicate the extent to which you agree or disagree with the following:

|                                                                                                    | Strongly disagree<br>(1) | Somewhat<br>disagree (2) | Somewhat agree<br>(3) | Strongly agree (6)    |
|----------------------------------------------------------------------------------------------------|--------------------------|--------------------------|-----------------------|-----------------------|
| The police officers responding to this situation should petition the court to issue a GVRO.<br>(1) | <input type="radio"/>    | <input type="radio"/>    | <input type="radio"/> | <input type="radio"/> |

Display These Two Questions:

*If Please indicate the extent to which you agree or disagree with the following: = The police officers responding to this situation should petition the court to issue a GVRO. [ Strongly agree ]*

*Or Please indicate the extent to which you agree or disagree with the following: = The police officers responding to this situation should petition the court to issue a GVRO. [ Somewhat agree ]*

Q10.4 Why do you  $\{Q10.2/ChoiceGroup/SelectedAnswers\}$  that the police officer should petition for a GVRO?

---

Q10.6 In addition, the responding officers should... (check all that apply)

- Make an arrest (1)
- Seek a domestic violence restraining order (2)
- Seek psychiatric assessment/hospitalization (3)
- Take some other action (please specify): (4) \_\_\_\_\_
- None of these (5)

*Display These Two Questions:*

*If Please indicate the extent to which you agree or disagree with the following: = The police officers responding to this situation should petition the court to issue a GVRO. [ Somewhat disagree ]*

*Or Please indicate the extent to which you agree or disagree with the following: = The police officers responding to this situation should petition the court to issue a GVRO. [ Strongly disagree ]*

Q10.8 Why do you  $\{Q10.2/ChoiceGroup/SelectedAnswers\}$  that the police officer should petition for a GVRO?

---

Q10.10 Instead, the responding officers should... (check all that apply)

- Make an arrest (1)
- Seek a domestic violence restraining order (2)
- Seek psychiatric assessment/hospitalization (3)
- Take some other action (please specify): (4) \_\_\_\_\_
- None of these (5)

-----

Q10.12 Do you have any additional thoughts about this situation?

---

**End of Block: Scenario 2A**

---

**Start of Block: Scenario 2B**

Q11.1 Scenario 2: A gay couple is going through a divorce and one of the men threatens to kill himself during an argument. The other man reports the threat to the police and says that his husband owns several firearms. The police have been called to the house for suicidal threats in the past year.

Q11.2 Please indicate the extent to which you agree or disagree with the following:

|                                                                                                    | Strongly disagree<br>(1) | Somewhat<br>disagree (2) | Somewhat agree<br>(3) | Strongly agree (6)    |
|----------------------------------------------------------------------------------------------------|--------------------------|--------------------------|-----------------------|-----------------------|
| The police officers responding to this situation should petition the court to issue a GVRO.<br>(1) | <input type="radio"/>    | <input type="radio"/>    | <input type="radio"/> | <input type="radio"/> |

*Display These Two Questions:*

*If Please indicate the extent to which you agree or disagree with the following: = The police officers responding to this situation should petition the court to issue a GVRO. [ Strongly agree ]*

*Or Please indicate the extent to which you agree or disagree with the following: = The police officers responding to this situation should petition the court to issue a GVRO. [ Somewhat agree ]*

Q11.4 Why do you  $\{Q11.2/ChoiceGroup/SelectedAnswers\}$  that the police officer should petition for a GVRO?

---

Q11.6 In addition, the responding officers should... (check all that apply)

- Make an arrest (1)
- Seek a domestic violence restraining order (2)
- Seek psychiatric assessment/hospitalization (3)
- Take some other action (please specify): (4) \_\_\_\_\_
- None of these (5)

*Display These Two Questions:*

*If Please indicate the extent to which you agree or disagree with the following: = The police officers responding to this situation should petition the court to issue a GVRO. [ Somewhat disagree ]*

*Or Please indicate the extent to which you agree or disagree with the following: = The police officers responding to this situation should petition the court to issue a GVRO. [ Strongly disagree ]*

Q11.8 Why do you  $\{Q11.2/ChoiceGroup/SelectedAnswers\}$  that the police officer should petition for a GVRO?

Q11.10 Instead, the responding officers should... (check all that apply)

- Make an arrest (1)
- Seek a domestic violence restraining order (2)
- Seek psychiatric assessment/hospitalization (3)
- Take some other action (please specify): (4) \_\_\_\_\_
- None of these (5)

---

Q11.12 Do you have any additional thoughts about this situation?

\_\_\_\_\_

End of Block: Scenario 2B

---

Start of Block: Scenario 3A

Q12.1 Scenario 3: At his father's funeral, a person with a history of depression tells his sister that he'd be better off dead. He just inherited his father's firearms. His sister reports the situation to the police.

Q12.2 Please indicate the extent to which you agree or disagree with the following:

|                                                                                                    | Strongly disagree<br>(1) | Somewhat<br>disagree (2) | Somewhat agree<br>(3) | Strongly agree (6)    |
|----------------------------------------------------------------------------------------------------|--------------------------|--------------------------|-----------------------|-----------------------|
| The police officers responding to this situation should petition the court to issue a GVRO.<br>(1) | <input type="radio"/>    | <input type="radio"/>    | <input type="radio"/> | <input type="radio"/> |

*Display These Two Questions:*

*If Please indicate the extent to which you agree or disagree with the following: = The police officers responding to this situation should petition the court to issue a GVRO. [ Strongly agree ]*

*Or Please indicate the extent to which you agree or disagree with the following: = The police officers responding to this situation should petition the court to issue a GVRO. [ Somewhat agree ]*

Q12.4 Why do you  $\{Q12.2/ChoiceGroup/SelectedAnswers\}$  that the police officer should petition for a GVRO?

\_\_\_\_\_

Q12.6 In addition, the responding officers should... (check all that apply)

- Make an arrest (1)
- Seek a domestic violence restraining order (2)
- Seek psychiatric assessment/hospitalization (3)
- Take some other action (please specify): (4) \_\_\_\_\_
- None of these (5)

*Display These Two Questions:*

*If Please indicate the extent to which you agree or disagree with the following: = The police officers responding to this situation should petition the court to issue a GVRO. [ Somewhat disagree ]*

*Or Please indicate the extent to which you agree or disagree with the following: = The police officers responding to this situation should petition the court to issue a GVRO. [ Strongly disagree ]*

Q12.8 Why do you  $\{Q12.2/ChoiceGroup/SelectedAnswers\}$  that the police officer should petition for a GVRO?

\_\_\_\_\_

Q12.10 Instead, the responding officers should... (check all that apply)

- Make an arrest (1)
- Seek a domestic violence restraining order (2)
- Seek psychiatric assessment/hospitalization (3)
- Take some other action (please specify): (4) \_\_\_\_\_
- None of these (5)

-----

Q12.12 Do you have any additional thoughts about this situation?

\_\_\_\_\_

**End of Block: Scenario 3A**

**Start of Block: Scenario 3B**

Q13.1 Scenario 3: At his father's funeral, a person with a history of addiction tells his sister that he'd be better off dead. He just inherited his father's firearms. His sister reports the situation to the police.

Q13.2 Please indicate the extent to which you agree or disagree with the following:



|                                                                                                    | Strongly disagree<br>(1) | Somewhat disagree (2) | Somewhat agree (3)    | Strongly agree (6)    |
|----------------------------------------------------------------------------------------------------|--------------------------|-----------------------|-----------------------|-----------------------|
| The police officers responding to this situation should petition the court to issue a GVRO.<br>(1) | <input type="radio"/>    | <input type="radio"/> | <input type="radio"/> | <input type="radio"/> |

*Display These Two Questions:*

*If Please indicate the extent to which you agree or disagree with the following: = The police officers responding to this situation should petition the court to issue a GVRO. [ Strongly agree ]*

*Or Please indicate the extent to which you agree or disagree with the following: = The police officers responding to this situation should petition the court to issue a GVRO. [ Somewhat agree ]*

Q13.4 Why do you  $\{Q13.2/ChoiceGroup/SelectedAnswers\}$  that the police officer should petition for a GVRO?

Q13.6 In addition, the responding officers should... (check all that apply)

- Make an arrest (1)
- Seek a domestic violence restraining order (2)
- Seek psychiatric assessment/hospitalization (3)
- Take some other action (please specify): (4) \_\_\_\_\_
- None of these (5)

*Display These Two Questions:*

*If Please indicate the extent to which you agree or disagree with the following: = The police officers responding to this situation should petition the court to issue a GVRO. [ Strongly disagree ]*

*Or Please indicate the extent to which you agree or disagree with the following: = The police officers responding to this situation should petition the court to issue a GVRO. [ Somewhat disagree ]*

Q13.8 Why do you  $\{Q13.2/ChoiceGroup/SelectedAnswers\}$  that the police officer should petition for a GVRO?

Q13.10 Instead, the responding officers should... (check all that apply)

- Make an arrest (1)
- Seek a domestic violence restraining order (2)
- Seek psychiatric assessment/hospitalization (3)
- Take some other action (please specify): (4) \_\_\_\_\_
- None of these (5)

Q13.12 Do you have any additional thoughts about this situation?

---

End of Block: Scenario 3B

---

Start of Block: Scenario 4A

Q14.1 Scenario 4: Shortly after sharing a post on Facebook praising school shooters, an 18-year old high school student posts a video of himself shooting an assault rifle (e.g., an AR or AK type rifle) at a shooting range. The student has been suspended from school several times.

Q14.2 Please indicate the extent to which you agree or disagree with the following:

|                                                                                                    | Strongly disagree<br>(1) | Somewhat<br>disagree (2) | Somewhat agree<br>(3) | Strongly agree (6)    |
|----------------------------------------------------------------------------------------------------|--------------------------|--------------------------|-----------------------|-----------------------|
| The police officers responding to this situation should petition the court to issue a GVRO.<br>(1) | <input type="radio"/>    | <input type="radio"/>    | <input type="radio"/> | <input type="radio"/> |

Display These Two Questions:

*If Please indicate the extent to which you agree or disagree with the following: = The police officers responding to this situation should petition the court to issue a GVRO. [ Strongly agree ]*

*Or Please indicate the extent to which you agree or disagree with the following: = The police officers responding to this situation should petition the court to issue a GVRO. [ Somewhat agree ]*

Q14.4 Why do you  $\{Q14.2/ChoiceGroup/SelectedAnswers\}$  that the police officer should petition for a GVRO?

---

Q14.6 In addition, the responding officers should... (check all that apply)

- Make an arrest (1)
- Seek a domestic violence restraining order (2)

- Seek psychiatric assessment/hospitalization (3)
- Take some other action (please specify): (4) \_\_\_\_\_
- None of these (5)

*Display These Two Questions:*

*If Please indicate the extent to which you agree or disagree with the following: = The police officers responding to this situation should petition the court to issue a GVRO. [ Somewhat disagree ]*

*Or Please indicate the extent to which you agree or disagree with the following: = The police officers responding to this situation should petition the court to issue a GVRO. [ Strongly disagree ]*

Q14.8 Why do you  $\{Q14.2/ChoiceGroup/SelectedAnswers\}$  that the police officer should petition for a GVRO?

\_\_\_\_\_

Q14.10 Instead, the responding officers should... (check all that apply)

- Make an arrest (1)
- Seek a domestic violence restraining order (2)
- Seek psychiatric assessment/hospitalization (3)
- Take some other action (please specify): (4) \_\_\_\_\_
- None of these (5)

-----

Q14.12 Do you have any additional thoughts about this situation?

\_\_\_\_\_

**End of Block: Scenario 4A**

---

**Start of Block: Scenario 4B**

Q15.1 Scenario 4: Shortly after sharing a post on Facebook praising school shooters, an 18-year old high school student posts a video of himself shooting a pistol at a shooting range. The student has been suspended from school several times.

Q15.2 Please indicate the extent to which you agree or disagree with the following:

|                                                                                                    | Strongly disagree<br>(1) | Somewhat disagree (2) | Somewhat agree (3)    | Strongly agree (6)    |
|----------------------------------------------------------------------------------------------------|--------------------------|-----------------------|-----------------------|-----------------------|
| The police officers responding to this situation should petition the court to issue a GVRO.<br>(1) | <input type="radio"/>    | <input type="radio"/> | <input type="radio"/> | <input type="radio"/> |

*Display These Two Questions:*

*If Please indicate the extent to which you agree or disagree with the following: = The police officers responding to this situation should petition the court to issue a GVRO. [ Strongly agree ]*

*Or Please indicate the extent to which you agree or disagree with the following: = The police officers responding to this situation should petition the court to issue a GVRO. [ Somewhat agree ]*

Q15.4 Why do you  $\{Q15.2/ChoiceGroup/SelectedAnswers\}$  that the police officer should petition for a GVRO?

---

Q15.6 In addition, the responding officers should... (check all that apply)

- Make an arrest (1)
- Seek a domestic violence restraining order (2)
- Seek psychiatric assessment/hospitalization (3)
- Take some other action (please specify): (4) \_\_\_\_\_
- None of these (5)

*Display These Two Questions:*

*If Please indicate the extent to which you agree or disagree with the following: = The police officers responding to this situation should petition the court to issue a GVRO. [ Somewhat disagree ]*

*Or Please indicate the extent to which you agree or disagree with the following: = The police officers responding to this situation should petition the court to issue a GVRO. [ Strongly disagree ]*

Q15.8 Why do you  $\{Q15.2/ChoiceGroup/SelectedAnswers\}$  that the police officer should petition for a GVRO?

---

Q15.10 Instead, the responding officers should... (check all that apply)

- Make an arrest (1)
- Seek a domestic violence restraining order (2)
- Seek psychiatric assessment/hospitalization (3)

- Take some other action (please specify): (4) \_\_\_\_\_
- None of these (5)

Q15.12 Do you have any additional thoughts about this situation?

\_\_\_\_\_

End of Block: Scenario 4B

Start of Block: Scenario 5A

Q16.1 Scenario 5: During an altercation at a party, a 23-year-old Black man threatens to shoot another young man in retaliation for a previous conflict. An anonymous partygoer reported the threat and believes the man owns firearms.

Q16.2 Please indicate the extent to which you agree or disagree with the following:

|                                                                                                    | Strongly disagree<br>(1) | Somewhat<br>disagree (2) | Somewhat agree<br>(3) | Strongly agree (6)    |
|----------------------------------------------------------------------------------------------------|--------------------------|--------------------------|-----------------------|-----------------------|
| The police officers responding to this situation should petition the court to issue a GVRO.<br>(1) | <input type="radio"/>    | <input type="radio"/>    | <input type="radio"/> | <input type="radio"/> |

*Display These Two Questions:*

*If Please indicate the extent to which you agree or disagree with the following: = The police officers responding to this situation should petition the court to issue a GVRO. [ Strongly agree ]*

*Or Please indicate the extent to which you agree or disagree with the following: = The police officers responding to this situation should petition the court to issue a GVRO. [ Somewhat agree ]*

Q16.4 Why do you  $\{Q16.2/ChoiceGroup/SelectedAnswers\}$  that the police officer should petition for a GVRO?

\_\_\_\_\_

Q16.6 In addition, the responding officers should... (check all that apply)

- Make an arrest (1)
- Seek a domestic violence restraining order (2)
- Seek psychiatric assessment/hospitalization (3)
- Take some other action (please specify): (4) \_\_\_\_\_
- None of these (5)

Display These Two Questions:

*If Please indicate the extent to which you agree or disagree with the following: = The police officers responding to this situation should petition the court to issue a GVRO. [ Strongly disagree ]*

*Or Please indicate the extent to which you agree or disagree with the following: = The police officers responding to this situation should petition the court to issue a GVRO. [ Somewhat disagree ]*

Q16.8 Why do you  $\{Q16.2/ChoiceGroup/SelectedAnswers\}$  that the police officer should petition for a GVRO?

---

Q16.10 Instead, the responding officers should... (check all that apply)

- Make an arrest (1)
  - Seek a domestic violence restraining order (2)
  - Seek psychiatric assessment/hospitalization (3)
  - Take some other action (please specify): (4) \_\_\_\_\_
  - None of these (5)
- 

Q16.12 What race/ethnicity did you imagine the potential victim to be?

- Non-Hispanic White (1)
- Non-Hispanic Black or African American (2)
- Hispanic (3)
- Native American (4)
- Asian or Pacific Islander (5)
- Middle Eastern or North African (6)
- A racial/ethnic group not listed above (7) \_\_\_\_\_
- I'm not sure (8)

Q16.14 Do you have any additional thoughts about this situation?

---

End of Block: Scenario 5A

---

Start of Block: Scenario 5B

Q17.1 Scenario 5: During an altercation at a party, a 23-year-old white man threatens to shoot another young man in retaliation for a previous conflict. An anonymous partygoer reported the threat and believes the man owns firearms.

Q17.2 Please indicate the extent to which you agree or disagree with the following:

|                                                                                                    | Strongly disagree<br>(1) | Somewhat<br>disagree (2) | Somewhat agree<br>(3) | Strongly agree (6)    |
|----------------------------------------------------------------------------------------------------|--------------------------|--------------------------|-----------------------|-----------------------|
| The police officers responding to this situation should petition the court to issue a GVRO.<br>(1) | <input type="radio"/>    | <input type="radio"/>    | <input type="radio"/> | <input type="radio"/> |

*Display These Two Questions:*

*If Please indicate the extent to which you agree or disagree with the following: = The police officers responding to this situation should petition the court to issue a GVRO. [ Strongly agree ]*

*Or Please indicate the extent to which you agree or disagree with the following: = The police officers responding to this situation should petition the court to issue a GVRO. [ Somewhat agree ]*

Q17.4 Why do you  $\{Q17.2/ChoiceGroup/SelectedAnswers\}$  that the police officer should petition for a GVRO?

---

Q17.6 In addition, the responding officers should... (check all that apply)

- Make an arrest (1)
- Seek a domestic violence restraining order (2)
- Seek psychiatric assessment/hospitalization (3)
- Take some other action (please specify): (4) \_\_\_\_\_
- None of these (5)

*Display These Two Questions:*

*If Please indicate the extent to which you agree or disagree with the following: = The police officers responding to this situation should petition the court to issue a GVRO. [ Somewhat disagree ]*

*Or Please indicate the extent to which you agree or disagree with the following: = The police officers responding to this situation should petition the court to issue a GVRO. [ Strongly disagree ]*

Q17.8 Why do you  $\{Q17.2/ChoiceGroup/SelectedAnswers\}$  that the police officer should petition for a GVRO?

---

Q17.10 Instead, the responding officers should... (check all that apply)

- Make an arrest (1)
- Seek a domestic violence restraining order (2)
- Seek psychiatric assessment/hospitalization (3)
- Take some other action (please specify): (4) \_\_\_\_\_

None of these (5)

---

Q17.12 What race/ethnicity did you imagine the potential victim to be?

- Non-Hispanic White (1)
- Non-Hispanic Black or African American (2)
- Hispanic (3)
- Native American (4)
- Asian or Pacific Islander (5)
- Middle Eastern or North African (6)
- A racial/ethnic group not listed above (7) \_\_\_\_\_
- I'm not sure (8)

Q17.14 Do you have any additional thoughts about this situation?

---

**End of Block: Scenario 5B**

---
