# Supplementary material for: Law Enforcement Officer Knowledge of, Attitudes Toward, and Willingness to Use Extreme Risk Protection Orders
Source: PubMed Central journal article supplement (PMC10587793; doi:10.1001/jamanetworkopen.2023.38455), 2023-10-19
Supplement: jamanetwopen-e2338455-s002.pdf [file jamanetwopen-e2338455-s002.pdf]

## Data Sharing Statement

Pear. Law Enforcement Officer Knowledge of, Attitudes Toward, and Willingness to Use Extreme Risk Protection Orders. *JAMA Netw Open*. Published October 19, 2023.  
doi:10.1001/jamanetworkopen.2023.38455

### Data

**Data available:** No

### Additional Information

**Explanation for why data not available:** Individual-level data will not be released per the terms of our IRB.
